# Supplementary material
Source: HighWire-hosted journal article supplement (https://bmjopen.bmj.com/content/11/6/e043940)
Supplement: inline-supplementary-material-1 [file inline-supplementary-material-1.pdf]

## Appendix

### Appendix A: Conceptualization of women empowerment status

#### Conceptualization of women empowerment

The measurement approaches of women's empowerment vary widely because of its multidimensional characteristics and country specific contextualization [1]. For this reason, different studies have used different indicators and developed models to measure women's empowerment, and yet none of these can be considered as a universal model [2]. According to Kishor (2000) [3], capturing the empowerment process with cross-sectional data requires indicators that evaluate the end product of the process (i.e., indicators that measure evidence of empowerment), as well as indicators of women's access to different sources of empowerment and of women's location within an appropriate setting for empowerment. Following this statement, evidence of empowerment could be sought out in terms of indicators that measure women's extrinsic and intrinsic control, i.e. women's participation in household decision making, as well as rejection of the gender-based subordination of women. Potential sources of empowerment are those that provide the building blocks for empowerment and access to resources, such as knowledge and employment for cash. And, indicators of the setting for empowerment refer to the circumstances of the respondent's current and past living arrangements and household structure, i.e. headship of the household. Together the indicators of evidence, sources, and setting provide a clear view of both the success and existence of the empowerment status of women within the household [3,4].

#### References

1. Pratley P. Associations between quantitative measures of women's empowerment and access to care and health status for mothers and their children: A systematic review of evidence from the developing world. *Soc Sci Med.* 2016 Nov 1;169:119–31.
2. Tuladhar S, Khanal KR, K. C. L, Ghimire PK, Onta K. Women's empowerment and spousal violence in relation to health outcomes in Nepal: Further Analysis of the 2011 Nepal Demographic and Health Survey. 2013 Mar 1 [cited 2020 Apr 25]; Available from: <https://dhsprogram.com/publications/publication-fa77-further-analysis.cfm>

3. Kishor S. Empowerment of Women in Egypt and Links to the Survival and Health of Their Infants. 2000 [cited 2020 May 1]; Available from: <https://africabib.org/rec.php?RID=W00080979&DB=w>
4. Kishor S, Subaiya L. Understanding women's empowerment: a comparative analysis of demographic and health surveys (DHS) data. 2008 Oct 1 [cited 2020 Apr 29]; Available from: <https://dhsprogram.com/publications/publication-cr20-comparative-reports.cfm>

**Appendix Table 1:** Determination of total sample size

| Country, survey year          | No. of Household interviewed | Total women (15-49 years) | Women with at least one birth in the last 3 or 5 years | Women with ANC history | Women with at least one ANC visit | Women receiving at least one ANC component | Missing information | Final sample size |
|-------------------------------|------------------------------|---------------------------|--------------------------------------------------------|------------------------|-----------------------------------|--------------------------------------------|---------------------|-------------------|
| <b>South Asia (N = 48107)</b> |                              |                           |                                                        |                        |                                   |                                            |                     |                   |
| Afghanistan 2015              | 24395                        | 29461                     | 19642                                                  | 19609                  | 11755                             | 10823                                      | 1855                | 8968              |
| Bangladesh 2014               | 17300                        | 17863                     | 7004                                                   | 4626                   | 3630                              | 3630                                       | 92                  | 3538              |
| India 2015-16                 | 601509                       | 699686                    | 184641                                                 | 184641                 | 152638                            | 152638                                     | 126312              | 26326             |
| Nepal 2016                    | 11040                        | 12862                     | 3998                                                   | 3998                   | 3762                              | 3751                                       | 39                  | 3712              |
| Pakistan 2018                 | 11869                        | 12364                     | 6711                                                   | 6711                   | 5866                              | 5865                                       | 302                 | 5563              |
| Total                         | 666113                       | 772236                    | 221996                                                 | 219585                 | 177651                            | 176707                                     | 128600              | <b>48107</b>      |

N, number of total women eligible for this study

**Appendix Table 2:** Country-specific skilled health care providers

| Country     | Specified skilled ANC providers                                                                                                                                                             |
|-------------|---------------------------------------------------------------------------------------------------------------------------------------------------------------------------------------------|
| Afghanistan | Doctors, Nurses/midwives, and Auxiliary nurse/midwives                                                                                                                                      |
| Bangladesh  | Qualified doctor, Nurse/midwife/paramedic, Family Welfare Visitor (FWV), Community Skilled Birth Attendant (CSBA), and Medical Assistant or sub-assistant community medical officer (SACMO) |
| India       | Doctor, Auxiliary nurse midwife, Nurse, Midwife, and Lady health visitor                                                                                                                    |
| Nepal       | Doctor, nurse, and midwife                                                                                                                                                                  |
| Pakistan    | Doctor, Nurse/midwife/lady health visitor                                                                                                                                                   |

**Appendix Table 3:** Indicators and their related variables, questions as well as aggregate codes of variables used in describing women empowerment status (WES)

| Indicators                 | Variables                        | Questions                                                   | Recode used for DHS response categories                                                                                                                         |
|----------------------------|----------------------------------|-------------------------------------------------------------|-----------------------------------------------------------------------------------------------------------------------------------------------------------------|
| Household decision making  | Women's health                   | Person who usually decides on respondent's healthcare       | Code = 1, if 'Respondent alone'<br>= 0, if 'Respondent and husband/partner; or, Husband/partner alone; or, Someone else; or, Other'                             |
|                            | Large household purchases        | Person who usually decides on large household purchases     |                                                                                                                                                                 |
|                            | Visiting relatives/family        | Person who usually decides on visits to family or relatives |                                                                                                                                                                 |
| Attitudes towards violence | Goes out without telling husband | Beating justified if wife goes out without telling husband  | Code = 1, if 'No'<br>= 0, if 'Yes; or, Don't know'                                                                                                              |
|                            | Neglects children                | Beating justified if wife neglects the children             |                                                                                                                                                                 |
|                            | Argues with husband              | Beating justified if wife argues with husband               |                                                                                                                                                                 |
|                            | Refuses sex                      | Beating justified if wife refuses to have sex with husband  |                                                                                                                                                                 |
|                            | Burns food                       | Beating justified if wife burns the food                    |                                                                                                                                                                 |
| Earning types              | Earning types                    | Type of earnings from respondent's work                     | Code = 0, if 'Not paid; or, Not working'<br>= 1, if 'In-kind only'<br>= 2, if 'Cash and in-kind'<br>= 3, if 'Cash only'                                         |
| Educational level          | Educational level of respondent  | Highest educational level                                   | Code = 0, if 'No education'<br>= 1, if 'Primary'<br>= 2, if 'Secondary'<br>= 3, if 'Higher'                                                                     |
| Headship of household      | Household head                   | Relationship to household head                              | Code = 2, if 'head'<br>= 0, if ' wife; or, daughter; or, daughter-in-law; or, granddaughter; or, mother; or, mother-in-law; or, sister; or any other relatives' |

**Appendix Table 4:** Coverage of antenatal care (ANC) in South Asia

| Country     | Sample sizes | ANC visits with skilled providers | 4 and more ANC visit | Received all ANC components | Adequate ANC     |
|-------------|--------------|-----------------------------------|----------------------|-----------------------------|------------------|
| Afghanistan | 8968         | 95.0 (93.7-96.1)                  | 32.0 (29.5-34.6)     | 15.1 (13.2-17.3)            | 8.4 (7.1-9.9)    |
| Bangladesh  | 3538         | 81.5 (77.3-85.1)                  | 40.0 (37.3-42.8)     | 31.3 (29.0-33.7)            | 16.1 (14.1-18.4) |
| India       | 26326        | 95.7 (95.3-96.0)                  | 64.7 (63.8-65.6)     | 50.8 (49.7-51.8)            | 37.8 (36.8-38.9) |
| Nepal       | 3712         | 89.1 (87.2-90.8)                  | 73.7 (71.2-76.0)     | 49.3 (46.7-51.0)            | 39.8 (37.4-42.2) |
| Pakistan    | 5563         | 98.1 (97.4-98.6)                  | 59.5 (56.5-62.5)     | 37.6 (34.8-40.5)            | 29.8 (27.2-32.5) |
| Pooled data | 48107        | 94.3 (93.8-94.8)                  | 56.9 (55.8-57.9)     | 41.1 (39.9-42.1)            | 30.0 (29.1-30.9) |

Note: Coverage of antenatal care with 95% confidence interval in parentheses

**Appendix Table 5:** Association of women empowerment and socio-economic status with coverage of antenatal care in the pooled data [N = 48107]

| Characteristics                                              | Total<br>N (%) | Adequate ANC<br>(%) [95% CI] | Model 1<br>OR [95% CI] | Model 2<br>AOR [95% CI] |
|--------------------------------------------------------------|----------------|------------------------------|------------------------|-------------------------|
| <b>Women's empowerment and socio-economic status (WESES)</b> |                |                              |                        |                         |
| Poor                                                         |                |                              |                        |                         |
| Low empowered                                                | 7270 (15.2)    | 17.2 (15.8-18.7)             | 1 (Ref.)               | 1 (Ref.)                |
| Medium empowered                                             | 3795 (13.1)    | 18.6 (17.1-20.2)             | 1.07 (0.96-1.19)       | 1.07 (0.96-1.19)        |
| Highly empowered                                             | 5634 (8.2)     | 23.3 (21.5-25.2)             | 1.50 (1.33-1.68)       | 1.33 (1.18-1.49)        |
| Middle class                                                 |                |                              |                        |                         |
| Low empowered                                                | 6293 (7.9)     | 29.4 (27.2-31.6)             | 2.02 (1.79-2.28)       | 1.57 (1.38-1.77)        |
| Medium empowered                                             | 3233 (6.7)     | 26.9 (24.7-29.2)             | 1.98 (1.75-2.24)       | 1.50 (1.32-1.70)        |
| Highly empowered                                             | 6611 (6.2)     | 33.6 (30.8-36.5)             | 2.65 (2.35-3.00)       | 1.91 (1.69-2.17)        |
| Rich                                                         |                |                              |                        |                         |
| Low empowered                                                | 3961 (11.7)    | 35.1 (32.8-37.5)             | 3.22 (2.88-3.60)       | 2.07 (1.84-2.32)        |
| Medium empowered                                             | 2990 (13.7)    | 36.7 (34.0-39.4)             | 3.57 (3.21-3.96)       | 2.22 (1.99-2.49)        |
| Highly empowered                                             | 8319 (17.3)    | 44.2 (42.2-46.3)             | 5.18 (4.68-5.72)       | 3.07 (2.75-3.43)        |
| <b>Respondent's age (in years)</b>                           |                |                              |                        |                         |
| 15-24                                                        | 16852 (35.0)   | 30.2 (28.9-31.4)             | -                      | 1 (Ref.)                |
| 25-34                                                        | 25307 (52.6)   | 37.7 (30.7-32.8)             | -                      | 1.06 (1.00-1.12)        |
| 35-49                                                        | 5948 (12.4)    | 22.0 (20.1-24.2)             | -                      | 1.18 (1.07-1.30)        |
| <b>Number of living children</b>                             |                |                              |                        |                         |
| 1-3                                                          | 37276 (77.5)   | 34.7 (33.8-35.7)             | -                      | 1.65 (1.52-1.79)        |
| 4 and more                                                   | 10831 (22.5)   | 13.6 (12.5-14.8)             | -                      | 1 (Ref.)                |
| <b>Media exposure</b>                                        |                |                              |                        |                         |
| No                                                           | 10779 (22.4)   | 14.7 (13.6-15.8)             | -                      | 1 (Ref.)                |
| Yes                                                          | 37328 (77.6)   | 34.4 (33.3-35.6)             | -                      | 1.69 (1.56-1.82)        |
| <b>Modern contraceptive used</b>                             |                |                              |                        |                         |
| No                                                           | 30250 (62.9)   | 27.8 (26.8-28.8)             | -                      | 1 (Ref.)                |
| Yes                                                          | 17857 (37.1)   | 33.7 (32.4-35.0)             | -                      | 1.23 (1.16-1.30)        |
| <b>Age at first birth</b>                                    |                |                              |                        |                         |
| ≥18 years                                                    | 39269 (81.6)   | 32.3 (31.3-33.3)             | -                      | 1.20 (1.11-1.30)        |
| 10-17 years                                                  | 8838 (18.4)    | 19.6 (18.2-21.1)             | -                      | 1 (Ref.)                |

|                                                 |              |                  |   |             |                  |
|-------------------------------------------------|--------------|------------------|---|-------------|------------------|
| <b>Last pregnancy was wanted</b>                |              |                  |   |             |                  |
| Unwanted                                        | 5557 (11.6)  | 20.3 (18.5-22.1) | - |             | 1 (Ref.)         |
| Wanted                                          | 42550 (88.5) | 31.2 (30.3-32.2) | - |             | 1.45 (1.33-1.58) |
| <b>Husband's educational level</b>              |              |                  |   |             |                  |
| No education                                    | 10484 (21.8) | 13.9 (12.7-15.1) | - |             | 1 (Ref.)         |
| Primary                                         | 7780 (16.2)  | 23.3 (21.6-25.1) | - |             | 1.17 (1.06-1.29) |
| Secondary and higher                            | 29842 (62.0) | 37.4 (36.4-38.4) | - |             | 1.44 (1.32-1.56) |
| <b>Place of residence</b>                       |              |                  |   |             |                  |
| Rural                                           | 31636 (65.8) | 24.7 (23.7-25.8) | - |             | 1 (Ref.)         |
| Urban                                           | 16471 (34.2) | 40.1 (38.5-41.7) | - |             | 1.28 (1.18-1.39) |
| <b>Random variance parameter: variance (SE)</b> |              |                  |   |             |                  |
| Community level                                 |              |                  |   | 1.62 (0.06) | 1.48 (0.06)      |
| Country level                                   |              |                  |   | 1.03 (0.65) | 0.75 (0.47)      |

N, number of total respondents; CI, confidence intervals; OR, odds ratio; AOR, adjusted odds ratio, Ref., reference category; SE, standard error;

Model II was additionally adjusted by respondent's age, number of children, media exposure, modern contraceptive usage, age at birth, wanted last pregnancy, husband's educational level, and place of region;

Significance level: \*p<0.05; \*\*p<0.01; \*\*\*p<0.001;

**Appendix Table 6:** Independent association of women empowerment with the coverage of antenatal care

| Characteristics                                 | Odds ratio (95% CI) |
|-------------------------------------------------|---------------------|
| <b>Women empowerment</b>                        |                     |
| Low                                             | 1.00                |
| Medium                                          | 1.13 (1.06-1.21)*** |
| High                                            | 1.79 (1.68-1.91)*** |
| <b>Random variance parameter: variance (SE)</b> |                     |
| Community level                                 | 1.91 (0.07)         |
| Country level                                   | 0.96 (0.61)         |

Significance level: \*p<0.05; \*\*p<0.01; \*\*\*p<0.001

**Appendix Table 7:** Independent association of socio-economic status (SES) with the coverage of antenatal care

| Characteristics                                 | Odds ratio (95% CI) |
|-------------------------------------------------|---------------------|
| <b>Socio-economic status</b>                    |                     |
| Low                                             | 1.00                |
| Medium                                          | 1.95 (1.81-2.10)*** |
| High                                            | 3.60 (3.37-3.86)*** |
| <b>Random variance parameter: variance (SE)</b> |                     |
| Community level                                 | 1.65 (0.07)         |
| Country level                                   | 1.03 (0.66)         |

Significance level: \*p<0.05; \*\*p<0.01; \*\*\*p<0.001

**Appendix Table 8:** Level of significance of the differences between the odds ratios from different categories of women empowerment and socio-economic status (WESES)

| Poor-low empowered (Ref.)                                    | Poor-Medium empowered | Poor-Highly empowered | Middle class-Low empowered | Middle class-Medium empowered | Middle class-Highly empowered | Rich-Low empowered | Rich-Medium empowered | Rich-Highly empowered |
|--------------------------------------------------------------|-----------------------|-----------------------|----------------------------|-------------------------------|-------------------------------|--------------------|-----------------------|-----------------------|
| Poor-Medium empowered                                        | xx                    |                       |                            |                               |                               |                    |                       |                       |
| Poor-Highly empowered                                        | 0.000                 | xx                    |                            |                               |                               |                    |                       |                       |
| Middle class-Low empowered                                   | 0.000                 | 0.000                 | xx                         |                               |                               |                    |                       |                       |
| Middle class-Medium empowered                                | 0.531                 | 0.000                 | 0.000                      | xx                            |                               |                    |                       |                       |
| Middle class-Highly empowered                                | 0.000                 | 0.152                 | 0.000                      | 0.000                         | xx                            |                    |                       |                       |
| Rich-Low empowered                                           | 0.016                 | 0.000                 | 0.000                      | 0.075                         | 0.000                         | xx                 |                       |                       |
| Rich-Medium empowered                                        | 0.003                 | 0.222                 | 0.000                      | 0.000                         | 0.011                         | 0.000              | xx                    |                       |
| Rich-Highly empowered                                        | 0.000                 | 0.000                 | 0.000                      | 0.000                         | 0.000                         | 0.000              | 0.000                 | xx                    |
| Ref., reference category; xx, not applicable                 |                       |                       |                            |                               |                               |                    |                       |                       |
| Red color indicates statistically non-significant difference |                       |                       |                            |                               |                               |                    |                       |                       |

**Appendix Table 9:** Association of women empowerment with coverage of ANC among the poor women (i.e. Sensitivity analysis)

| Characteristics                                 | Model I<br>OR [95% CI] | Mode II<br>AOR [95% CI] |
|-------------------------------------------------|------------------------|-------------------------|
| <b>Women empowerment level</b>                  |                        |                         |
| Low                                             | 1.00                   | 1.00                    |
| Medium                                          | 1.04 (0.93-1.16)       | 1.04 (0.93-1.16)        |
| High                                            | 1.53 (1.35-1.73)***    | 1.36 (1.20-1.54)***     |
| <b>Random variance parameter: variance (SE)</b> |                        |                         |
| Community level                                 | 1.93 (0.14)            | 1.59 (0.12)             |
| Country level                                   | 1.08 (0.70)            | 0.79 (0.51)             |

Model II was additionally adjusted by respondent's age, number of children, media exposure, modern contraceptive usage, age at birth, wanted last pregnancy, husband's educational level, and place of region;

Significance level: \*p<0.05; \*\*p<0.01; \*\*\*p<0.001
